# Supplementary material for: Phenome-Wide Association Study of Latent Autoimmune Diabetes from a Southern Mexican Population Implicates rs7305229 with Plasmatic AntiGlutamic Acid Decarboxylase Autoantibody (GADA) Levels
Source: Preprints.org preprint supplement (doi:10.20944/preprints202409.0287.v1), 2024-09-04
Supplement: Supplementary file 1 [file supplementary]

Supplementary Figure 1. Manhattan plot of the GWAS of LADA.

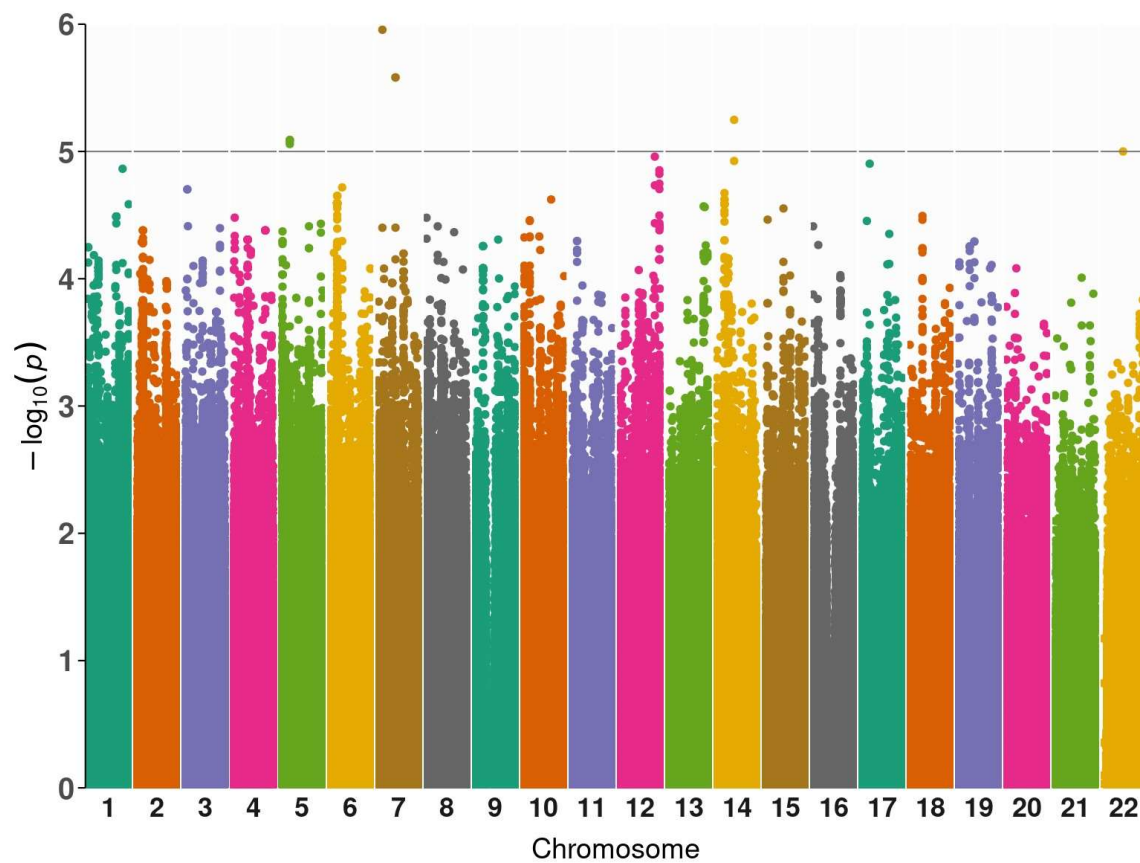

The gray line marks the threshold for nominal significance. Nominal significance was defined as 5 ( $-\log_{10}(1 \times 10^{-5})$ ).
