# Supplementary material for: Phenome-Wide Association Study of Latent Autoimmune Diabetes from a Southern Mexican Population Implicates rs7305229 with Plasmatic AntiGlutamic Acid Decarboxylase Autoantibody (GADA) Levels
Source: Preprints.org preprint supplement (doi:10.20944/preprints202409.0287.v1), 2024-09-04
Supplement: Supplementary file 1 [file supplementary]

## Sheet: GADA
CHR	SNP	BP	A1	A2	MAF	Genotyped	Rsq	BETA	SE	P
1	chr1:13792834:C:T	13792834	T	C	0.11	Imputed	0.92509	-1.316	0.2574	6.654e-06
1	chr1:54269551:C:A	54269551	A	C	0.42	Imputed	0.78433	-0.818	0.1631	9.18e-06
1	chr1:98498830:A:C	98498830	C	A	0.23	Genotyped	0.99394	-0.9628	0.1762	2.056e-06
1	chr1:98872606:T:G	98872606	T	G	0.34	Imputed	0.96668	-0.8417	0.1616	4.829e-06
4	chr4:155035849:T:A	155035849	A	T	0.41	Imputed	0.941	0.8763	0.1631	2.794e-06
5	chr5:169845606:C:T	169845606	T	C	0.37	Imputed	0.98052	-0.9381	0.1676	1.314e-06
12	chr12:49846521:G:A	49846521	A	G	0.21	Imputed	0.83447	-1.263	0.211	3.518e-07
12	chr12:49846558:G:C	49846558	C	G	0.21	Imputed	0.83611	-1.263	0.211	3.518e-07
12	chr12:49847230:G:A	49847230	A	G	0.21	Imputed	0.8364	-1.263	0.211	3.518e-07
12	chr12:49849588:G:A	49849588	G	A	0.34	Imputed	0.81205	-1.092	0.1939	1.168e-06
12	chr12:49849889:A:G	49849889	G	A	0.21	Imputed	0.8363	-1.263	0.211	3.518e-07
12	chr12:49850240:C:T	49850240	C	T	0.34	Imputed	0.80887	-1.092	0.1939	1.168e-06
12	chr12:49850241:G:A	49850241	A	G	0.21	Imputed	0.82934	-1.263	0.211	3.518e-07
12	chr12:49850260:C:T	49850260	T	C	0.21	Imputed	0.83731	-1.263	0.211	3.518e-07
12	chr12:49850984:A:T	49850984	T	A	0.19	Imputed	0.8423	-1.217	0.2355	5.482e-06
12	chr12:49851185:G:C	49851185	G	C	0.34	Imputed	0.82292	-1.092	0.1939	1.168e-06
12	chr12:49851923:A:G	49851923	G	A	0.19	Imputed	0.84598	-1.217	0.2355	5.482e-06
12	chr12:49854269:C:T	49854269	T	C	0.19	Imputed	0.84577	-1.217	0.2355	5.482e-06
12	chr12:49854299:T:C	49854299	T	C	0.34	Imputed	0.82202	-1.092	0.1939	1.168e-06
12	chr12:49854562:T:A	49854562	T	A	0.34	Imputed	0.82223	-1.092	0.1939	1.168e-06
12	chr12:49854941:T:C	49854941	T	C	0.34	Imputed	0.82184	-1.092	0.1939	1.168e-06
12	chr12:49855087:TC:T	49855087	T	TC	0.2	Imputed	0.84422	-1.215	0.2063	4.929e-07
12	chr12:49856886:C:T	49856886	C	T	0.34	Imputed	0.82214	-1.092	0.1939	1.168e-06
12	chr12:49866481:C:T	49866481	T	C	0.22	Imputed	0.83218	-1.267	0.1847	1.837e-08
14	chr14:38579339:T:G	38579339	T	G	0.29	Imputed	0.94239	-0.9471	0.1798	3.953e-06
17	chr17:57897843:A:T	57897843	A	T	0.21	Imputed	0.76716	-1.041	0.2024	6.026e-06

## Sheet: Hip Circumference
CHR	SNP	BP	A1	A2	MAF	Genotyped	Rsq	BETA	SE	P
3	chr3:34024368:TG:T	34024368	T	TG	0.46	Imputed	0.96674	-0.9891	0.156	2.165e-07
3	chr3:34026597:CT:C	34026597	C	CT	0.46	Imputed	0.96632	-0.9891	0.156	2.165e-07
3	chr3:34027451:G:T	34027451	T	G	0.46	Imputed	0.96856	-0.953	0.1754	3.679e-06
7	chr7:78381926:A:T	78381926	T	A	0.28	Imputed	0.97433	-0.9612	0.1843	7.246e-06
7	chr7:78383369:A:G	78383369	G	A	0.28	Imputed	0.97421	-0.9612	0.1843	7.246e-06
7	chr7:78383896:C:T	78383896	T	C	0.28	Imputed	0.97581	-0.9612	0.1843	7.246e-06
7	chr7:78385538:G:T	78385538	T	G	0.28	Imputed	0.9758	-0.9612	0.1843	7.246e-06
7	chr7:78385675:T:C	78385675	C	T	0.28	Imputed	0.97587	-0.9612	0.1843	7.246e-06
7	chr7:78386008:T:A	78386008	A	T	0.28	Imputed	0.97583	-0.9612	0.1843	7.246e-06
7	chr7:78386951:C:A	78386951	A	C	0.28	Imputed	0.97545	-0.9612	0.1843	7.246e-06
7	chr7:78387497:A:G	78387497	G	A	0.28	Imputed	0.97539	-0.9612	0.1843	7.246e-06
7	chr7:78387623:T:C	78387623	C	T	0.28	Imputed	0.9754	-0.9612	0.1843	7.246e-06
7	chr7:78388022:C:A	78388022	A	C	0.28	Imputed	0.97568	-0.9612	0.1843	7.246e-06
7	chr7:78388025:C:T	78388025	T	C	0.28	Imputed	0.97564	-0.9612	0.1843	7.246e-06
7	chr7:78388141:C:G	78388141	G	C	0.28	Imputed	0.97564	-0.9612	0.1843	7.246e-06
7	chr7:78388671:G:A	78388671	A	G	0.28	Imputed	0.97578	-0.9612	0.1843	7.246e-06
7	chr7:78389386:A:G	78389386	G	A	0.28	Imputed	0.9741	-0.9612	0.1843	7.246e-06
7	chr7:78389484:G:A	78389484	A	G	0.28	Imputed	0.97558	-0.9612	0.1843	7.246e-06
7	chr7:78389714:AT:A	78389714	A	AT	0.28	Imputed	0.97579	-0.9612	0.1843	7.246e-06
7	chr7:78389752:G:C	78389752	C	G	0.28	Imputed	0.97555	-0.9612	0.1843	7.246e-06
7	chr7:78390029:G:A	78390029	A	G	0.28	Imputed	0.97575	-0.9612	0.1843	7.246e-06
7	chr7:78390080:G:A	78390080	A	G	0.28	Imputed	0.97574	-0.9612	0.1843	7.246e-06
7	chr7:78390333:T:A	78390333	A	T	0.28	Imputed	0.97571	-0.9612	0.1843	7.246e-06
7	chr7:78390381:C:T	78390381	T	C	0.28	Imputed	0.97576	-0.9612	0.1843	7.246e-06
7	chr7:78390440:A:T	78390440	T	A	0.28	Imputed	0.97568	-0.9612	0.1843	7.246e-06
7	chr7:78390602:A:G	78390602	G	A	0.28	Imputed	0.97569	-0.9612	0.1843	7.246e-06
7	chr7:78395230:A:G	78395230	G	A	0.28	Imputed	0.97266	-0.9612	0.1843	7.246e-06
7	chr7:78395311:A:G	78395311	G	A	0.28	Imputed	0.97228	-0.9612	0.1843	7.246e-06
7	chr7:78395749:A:C	78395749	C	A	0.27	Imputed	0.9721	-0.9612	0.1843	7.246e-06
7	chr7:78395751:A:T	78395751	T	A	0.27	Imputed	0.97227	-0.9612	0.1843	7.246e-06
7	chr7:78395816:C:T	78395816	T	C	0.27	Imputed	0.97238	-0.9612	0.1843	7.246e-06
7	chr7:78396010:C:T	78396010	T	C	0.27	Imputed	0.97326	-0.9612	0.1843	7.246e-06
7	chr7:78397145:T:C	78397145	C	T	0.27	Imputed	0.97042	-0.9612	0.1843	7.246e-06
7	chr7:78397316:A:G	78397316	G	A	0.27	Imputed	0.97081	-0.9612	0.1843	7.246e-06
7	chr7:78398782:C:A	78398782	A	C	0.27	Imputed	0.97043	-0.9612	0.1843	7.246e-06
7	chr7:78399061:T:A	78399061	A	T	0.27	Imputed	0.97065	-0.9612	0.1843	7.246e-06
7	chr7:78400357:AT:A	78400357	A	AT	0.27	Imputed	0.96582	-0.9612	0.1843	7.246e-06
7	chr7:78400481:A:G	78400481	G	A	0.27	Imputed	0.96573	-0.9612	0.1843	7.246e-06
7	chr7:98046103:G:A	98046103	A	G	0.25	Imputed	0.92461	0.8536	0.1661	9.158e-06
7	chr7:98107884:G:A	98107884	A	G	0.2	Imputed	0.91965	0.9842	0.186	5.723e-06
7	chr7:98107925:T:C	98107925	C	T	0.2	Imputed	0.92078	0.9842	0.186	5.723e-06
7	chr7:98108067:G:A	98108067	A	G	0.2	Imputed	0.92122	0.9842	0.186	5.723e-06
10	chr10:76404754:T:C	76404754	C	T	0.11	Imputed	0.94138	1.759	0.3271	4.364e-06
20	chr20:19952544:G:A	19952544	A	G	0.16	Imputed	0.69952	-1.154	0.2013	1.428e-06

## Sheet: Waist Circumference
CHR	SNP	BP	A1	A2	MAF	Genotyped	Rsq	BETA	SE	P
6	chr6:118750550:G:A	118750550	G	A	0.38	Imputed	0.88574	1.085	0.177	4.694e-07
7	chr7:7900504:G:A	7900504	A	G	0.11	Imputed	0.84841	1.768	0.3359	6.681e-06
8	chr8:139794832:A:G	139794832	G	A	0.23	Imputed	0.96465	1.358	0.2606	7.907e-06
8	chr8:139797371:T:C	139797371	C	T	0.23	Imputed	0.96327	1.358	0.2606	7.907e-06
8	chr8:139798511:C:T	139798511	T	C	0.23	Imputed	0.96086	1.358	0.2606	7.907e-06
8	chr8:139801834:T:C	139801834	C	T	0.23	Imputed	0.9601	1.358	0.2606	7.907e-06
8	chr8:139801923:G:C	139801923	C	G	0.23	Imputed	0.96132	1.358	0.2606	7.907e-06
8	chr8:139802262:A:G	139802262	G	A	0.23	Imputed	0.96062	1.358	0.2606	7.907e-06
8	chr8:139803020:G:A	139803020	A	G	0.23	Imputed	0.96321	1.358	0.2606	7.907e-06
8	chr8:139805363:C:T	139805363	T	C	0.23	Imputed	0.96351	1.358	0.2606	7.907e-06
8	chr8:139805628:G:A	139805628	A	G	0.23	Imputed	0.96354	1.358	0.2606	7.907e-06
8	chr8:139807052:G:A	139807052	A	G	0.23	Imputed	0.96323	1.358	0.2606	7.907e-06
8	chr8:139809988:C:T	139809988	T	C	0.23	Imputed	0.95992	1.358	0.2606	7.907e-06
8	chr8:139811740:C:T	139811740	T	C	0.23	Imputed	0.9598	1.358	0.2606	7.907e-06
8	chr8:139811865:C:T	139811865	T	C	0.23	Imputed	0.96092	1.358	0.2606	7.907e-06
8	chr8:139812127:T:A	139812127	A	T	0.23	Imputed	0.96022	1.358	0.2606	7.907e-06
8	chr8:139812601:T:C	139812601	C	T	0.23	Imputed	0.95735	1.358	0.2606	7.907e-06
8	chr8:139812687:C:T	139812687	T	C	0.23	Imputed	0.95946	1.358	0.2606	7.907e-06
8	chr8:139820858:T:A	139820858	A	T	0.23	Imputed	0.95521	1.358	0.2606	7.907e-06
15	chr15:34778664:T:G	34778664	T	G	0.45	Genotyped	0.99746	1.014	0.1865	3.907e-06
15	chr15:34780625:G:A	34780625	G	A	0.45	Imputed	0.89156	1.014	0.1865	3.907e-06
15	chr15:34781266:C:T	34781266	C	T	0.45	Imputed	0.89138	1.014	0.1865	3.907e-06
16	chr16:56353376:T:C	56353376	C	T	0.33	Imputed	0.96658	1.091	0.2122	9.733e-06
16	chr16:56453533:C:G	56453533	G	C	0.34	Imputed	0.97938	1.054	0.1912	3.137e-06
20	chr20:4772461:A:T	4772461	T	A	0.23	Imputed	0.96314	-1.295	0.2434	5.677e-06

## Sheet: Cholesterol
CHR	SNP	BP	A1	A2	MAF	Genotyped	Rsq	BETA	SE	P
1	chr1:64348782:C:T	64348782	C	T	0.36	Imputed	0.95885	1.039	0.2031	9.278e-06
1	chr1:243439088:G:A	243439088	A	G	0.25	Imputed	0.90952	-1.177	0.2118	2.327e-06
3	chr3:24146009:T:C	24146009	C	T	0.49	Imputed	0.89636	0.8655	0.1577	2.88e-06
3	chr3:152564945:T:C	152564945	C	T	0.26	Imputed	0.88373	-1.005	0.1752	1.313e-06
3	chr3:180925276:G:A	180925276	A	G	0.26	Imputed	0.96962	-1.028	0.2001	8.577e-06
3	chr3:180964597:G:A	180964597	A	G	0.26	Imputed	0.96453	-1.028	0.2001	8.577e-06
4	chr4:167945031:T:C	167945031	C	T	0.49	Imputed	0.89815	0.9005	0.176	9.223e-06
4	chr4:167970289:T:A	167970289	A	T	0.49	Imputed	0.90446	0.9005	0.176	9.223e-06
4	chr4:167976426:G:T	167976426	T	G	0.49	Imputed	0.90519	0.9005	0.176	9.223e-06
4	chr4:167990548:A:C	167990548	C	A	0.49	Imputed	0.90238	0.9005	0.176	9.223e-06
4	chr4:167995962:G:T	167995962	T	G	0.49	Imputed	0.90291	0.9005	0.176	9.223e-06
5	chr5:31980007:G:T	31980007	G	T	0.15	Imputed	0.50694	1.388	0.266	6.719e-06
5	chr5:180451993:G:T	180451993	T	G	0.38	Imputed	0.79594	1.134	0.1972	1.259e-06
6	chr6:161834503:G:T	161834503	T	G	0.24	Imputed	0.82216	1.321	0.2563	8.205e-06
8	chr8:16730567:T:TA	16730567	TA	T	0.2	Imputed	0.79186	1.341	0.2509	4.492e-06
10	chr10:29888699:G:GC	29888699	G	GC	0.43	Imputed	0.94028	1.081	0.2106	8.736e-06
10	chr10:29888705:T:A	29888705	T	A	0.43	Imputed	0.94656	1.081	0.2106	8.736e-06
10	chr10:29888959:T:C	29888959	T	C	0.44	Imputed	0.95032	1.052	0.2027	7.32e-06
10	chr10:29891813:C:T	29891813	C	T	0.43	Imputed	0.94673	1.081	0.2106	8.736e-06
10	chr10:29893942:C:T	29893942	C	T	0.43	Imputed	0.94745	1.081	0.2106	8.736e-06
11	chr11:117952514:TG:T	117952514	T	TG	0.06	Imputed	0.94562	-2.052	0.3752	3.035e-06
16	chr16:60749928:G:A	60749928	A	G	0.26	Imputed	0.93811	-1.029	0.1893	3.391e-06
16	chr16:60753762:G:T	60753762	T	G	0.26	Imputed	0.93886	-1.029	0.1893	3.391e-06
16	chr16:60754399:T:G	60754399	G	T	0.26	Imputed	0.93896	-1.029	0.1893	3.391e-06
16	chr16:60755685:TA:T	60755685	T	TA	0.3	Imputed	0.9024	-1.006	0.1822	2.562e-06
16	chr16:60757751:C:A	60757751	A	C	0.26	Imputed	0.93906	-1.029	0.1893	3.391e-06
16	chr16:60758442:A:G	60758442	G	A	0.3	Imputed	0.90368	-1.006	0.1822	2.562e-06
17	chr17:72722741:T:C	72722741	C	T	0.3	Imputed	0.87761	-0.9621	0.1773	3.486e-06
17	chr17:72725568:A:G	72725568	G	A	0.29	Genotyped	0.99279	-0.9965	0.1915	6.992e-06
17	chr17:72725643:C:A	72725643	A	C	0.29	Imputed	0.94745	-0.9965	0.1915	6.992e-06
17	chr17:72725718:T:C	72725718	C	T	0.29	Imputed	0.94796	-0.9965	0.1915	6.992e-06
18	chr18:765919:T:G	765919	T	G	0.34	Imputed	0.90901	0.9358	0.179	6.495e-06
18	chr18:766847:T:A	766847	T	A	0.34	Imputed	0.91068	0.9358	0.179	6.495e-06
18	chr18:767053:ATCTGTAAGTCTGAACTCT:A	767053	ATCTGTAAGTCTGAACTCT	A	0.34	Imputed	0.90903	0.9358	0.179	6.495e-06
18	chr18:768997:T:C	768997	T	C	0.34	Imputed	0.90944	0.9358	0.179	6.495e-06
18	chr18:769988:T:C	769988	T	C	0.34	Imputed	0.90922	0.9358	0.179	6.495e-06
18	chr18:770395:G:A	770395	G	A	0.34	Imputed	0.90849	0.9358	0.179	6.495e-06
18	chr18:771286:G:C	771286	G	C	0.34	Imputed	0.91014	0.9358	0.179	6.495e-06
18	chr18:771861:T:C	771861	T	C	0.34	Imputed	0.90953	0.9358	0.179	6.495e-06
18	chr18:774904:C:T	774904	C	T	0.34	Imputed	0.90989	0.9358	0.179	6.495e-06
18	chr18:775500:C:T	775500	C	T	0.34	Imputed	0.90949	0.9358	0.179	6.495e-06
18	chr18:776018:C:T	776018	C	T	0.34	Imputed	0.91056	0.9358	0.179	6.495e-06
18	chr18:778383:A:C	778383	A	C	0.34	Imputed	0.91029	0.9358	0.179	6.495e-06
18	chr18:778883:C:T	778883	C	T	0.34	Imputed	0.90963	0.9358	0.179	6.495e-06
18	chr18:780110:T:C	780110	T	C	0.34	Imputed	0.91042	0.9358	0.179	6.495e-06
18	chr18:780321:A:G	780321	A	G	0.34	Imputed	0.90981	0.9358	0.179	6.495e-06
18	chr18:780355:C:A	780355	C	A	0.34	Imputed	0.90979	0.9358	0.179	6.495e-06
18	chr18:781513:T:C	781513	T	C	0.34	Imputed	0.91033	0.9358	0.179	6.495e-06
18	chr18:782910:A:G	782910	A	G	0.34	Imputed	0.90982	0.9358	0.179	6.495e-06
18	chr18:783390:AAC:A	783390	AAC	A	0.36	Imputed	0.89732	0.9546	0.1802	5.202e-06
18	chr18:784612:C:G	784612	C	G	0.34	Imputed	0.90883	0.9358	0.179	6.495e-06
18	chr18:785430:A:G	785430	A	G	0.34	Imputed	0.90893	0.9358	0.179	6.495e-06
18	chr18:785964:C:G	785964	C	G	0.34	Imputed	0.90896	0.9358	0.179	6.495e-06
18	chr18:786994:A:G	786994	A	G	0.34	Imputed	0.91071	0.9358	0.179	6.495e-06
18	chr18:787846:G:C	787846	G	C	0.34	Imputed	0.91055	0.9358	0.179	6.495e-06
18	chr18:789916:A:G	789916	A	G	0.34	Imputed	0.90977	0.9358	0.179	6.495e-06
18	chr18:790311:A:G	790311	A	G	0.34	Imputed	0.90979	0.9358	0.179	6.495e-06
18	chr18:791083:C:CT	791083	C	CT	0.35	Imputed	0.90528	0.9546	0.1802	5.202e-06
18	chr18:792172:T:C	792172	T	C	0.34	Imputed	0.90898	0.9358	0.179	6.495e-06
18	chr18:792860:AG:A	792860	AG	A	0.34	Imputed	0.9035	0.9358	0.179	6.495e-06
18	chr18:793547:G:C	793547	G	C	0.34	Imputed	0.91038	0.9358	0.179	6.495e-06
18	chr18:796460:T:G	796460	T	G	0.34	Imputed	0.90888	0.9358	0.179	6.495e-06
18	chr18:798268:C:T	798268	C	T	0.34	Imputed	0.90938	0.9358	0.179	6.495e-06
18	chr18:798446:C:T	798446	C	T	0.34	Imputed	0.90914	0.9358	0.179	6.495e-06
18	chr18:800536:G:A	800536	G	A	0.34	Imputed	0.90942	0.9358	0.179	6.495e-06
18	chr18:804013:T:C	804013	T	C	0.34	Imputed	0.90975	0.9358	0.179	6.495e-06
18	chr18:807974:T:C	807974	T	C	0.34	Imputed	0.91011	0.9358	0.179	6.495e-06

## Sheet: Insulin Use Onset
CHR	SNP	BP	A1	A2	MAF	Genotyped	Rsq	BETA	SE	P
1	chr1:106606474:T:A	106606474	A	T	0.2	Imputed	0.97507	-0.4077	0.07542	4.324e-06
2	chr2:211240661:A:C	211240661	A	C	0.2	Imputed	0.93861	-0.4494	0.07168	3.046e-07
3	chr3:66387916:G:T	66387916	G	T	0.26	Imputed	0.95016	-0.4228	0.08175	8.869e-06
3	chr3:171345400:A:C	171345400	C	A	0.42	Imputed	0.86369	-0.3146	0.06067	8.501e-06
3	chr3:171345916:G:A	171345916	A	G	0.42	Imputed	0.86511	-0.3146	0.06067	8.501e-06
7	chr7:154485540:C:T	154485540	C	T	0.39	Imputed	0.83414	-0.3366	0.06235	4.428e-06
7	chr7:154485943:C:T	154485943	C	T	0.43	Imputed	0.81663	-0.3416	0.06572	8.22e-06
7	chr7:154487135:T:C	154487135	T	C	0.43	Imputed	0.81803	-0.3416	0.06572	8.22e-06
10	chr10:97040342:G:A	97040342	A	G	0.2	Imputed	0.92039	-0.4298	0.07746	2.786e-06
10	chr10:118496021:G:A	118496021	A	G	0.09	Imputed	0.9518	-0.5788	0.1098	6.587e-06
10	chr10:118499008:T:G	118499008	G	T	0.1	Imputed	0.96648	-0.5788	0.1098	6.587e-06
10	chr10:118549512:TCTA:T	118549512	T	TCTA	0.09	Imputed	0.96217	-0.5788	0.1098	6.587e-06
10	chr10:118589145:C:T	118589145	T	C	0.1	Imputed	0.98471	-0.5788	0.1098	6.587e-06
10	chr10:118589228:T:C	118589228	C	T	0.1	Imputed	0.98761	-0.5788	0.1098	6.587e-06
10	chr10:118589517:T:G	118589517	G	T	0.1	Imputed	0.9855	-0.5788	0.1098	6.587e-06
10	chr10:118594331:G:A	118594331	A	G	0.1	Genotyped	0.99883	-0.5788	0.1098	6.587e-06
10	chr10:118594960:C:T	118594960	T	C	0.1	Imputed	0.98714	-0.5788	0.1098	6.587e-06
10	chr10:118595763:T:C	118595763	C	T	0.1	Imputed	0.98832	-0.5788	0.1098	6.587e-06
10	chr10:118595764:C:T	118595764	T	C	0.1	Imputed	0.98832	-0.5788	0.1098	6.587e-06
10	chr10:118595789:G:C	118595789	C	G	0.1	Imputed	0.98832	-0.5788	0.1098	6.587e-06
10	chr10:118596032:C:T	118596032	T	C	0.1	Imputed	0.98822	-0.5788	0.1098	6.587e-06
10	chr10:118597195:A:G	118597195	G	A	0.1	Imputed	0.9892	-0.5788	0.1098	6.587e-06
10	chr10:118597797:A:G	118597797	G	A	0.1	Imputed	0.98932	-0.5788	0.1098	6.587e-06
10	chr10:118598912:C:T	118598912	T	C	0.1	Imputed	0.98936	-0.5788	0.1098	6.587e-06
10	chr10:118599454:A:G	118599454	G	A	0.1	Imputed	0.97836	-0.5788	0.1098	6.587e-06
10	chr10:118602200:T:C	118602200	C	T	0.1	Imputed	0.97837	-0.5788	0.1098	6.587e-06
10	chr10:118602479:C:T	118602479	T	C	0.1	Imputed	0.97813	-0.5788	0.1098	6.587e-06
10	chr10:118603387:G:A	118603387	A	G	0.1	Imputed	0.97841	-0.5788	0.1098	6.587e-06
10	chr10:118603644:G:A	118603644	A	G	0.1	Imputed	0.97829	-0.5788	0.1098	6.587e-06
10	chr10:118605022:T:C	118605022	C	T	0.1	Imputed	0.97831	-0.5788	0.1098	6.587e-06
10	chr10:118605346:T:C	118605346	C	T	0.1	Imputed	0.97789	-0.5788	0.1098	6.587e-06
10	chr10:118606256:G:T	118606256	T	G	0.09	Imputed	0.97643	-0.5788	0.1098	6.587e-06
10	chr10:118614575:C:T	118614575	T	C	0.06	Imputed	0.94412	-0.5954	0.1121	5.787e-06
10	chr10:119192525:G:A	119192525	A	G	0.34	Imputed	0.95644	-0.362	0.05762	2.916e-07
10	chr10:119193323:T:C	119193323	C	T	0.34	Imputed	0.95633	-0.362	0.05762	2.916e-07
11	chr11:1680654:G:C	1680654	G	C	0.44	Imputed	0.91974	0.361	0.0674	5.033e-06
11	chr11:1680825:A:T	1680825	A	T	0.44	Imputed	0.92009	0.361	0.0674	5.033e-06
11	chr11:1681699:G:A	1681699	G	A	0.44	Imputed	0.91885	0.361	0.0674	5.033e-06
11	chr11:1682334:C:T	1682334	C	T	0.44	Imputed	0.91907	0.361	0.0674	5.033e-06
11	chr11:1682731:GGCAGTGGGACA:G	1682731	GGCAGTGGGACA	G	0.44	Imputed	0.91998	0.361	0.0674	5.033e-06
11	chr11:1683366:G:A	1683366	G	A	0.44	Imputed	0.91858	0.361	0.0674	5.033e-06
11	chr11:1688691:C:T	1688691	C	T	0.44	Imputed	0.92282	0.361	0.0674	5.033e-06
11	chr11:12238808:C:T	12238808	T	C	0.09	Imputed	0.90844	-0.607	0.1164	7.768e-06
12	chr12:4283225:C:A	4283225	A	C	0.19	Imputed	0.59797	-0.5433	0.08711	3.354e-07
17	chr17:29060397:G:A	29060397	A	G	0.27	Imputed	0.96747	0.3639	0.06963	7.499e-06
17	chr17:29217745:A:G	29217745	G	A	0.27	Imputed	0.97988	0.3777	0.07041	4.914e-06
19	chr19:29772912:T:C	29772912	C	T	0.14	Imputed	0.92642	-0.455	0.07963	1.677e-06
19	chr19:29775695:G:A	29775695	A	G	0.14	Imputed	0.9286	-0.455	0.07963	1.677e-06
19	chr19:29780631:A:G	29780631	G	A	0.14	Imputed	0.92975	-0.455	0.07963	1.677e-06
19	chr19:29782568:GTC:G	29782568	G	GTC	0.14	Imputed	0.92833	-0.455	0.07963	1.677e-06
19	chr19:29789660:C:T	29789660	T	C	0.14	Imputed	0.92826	-0.455	0.07963	1.677e-06
19	chr19:56274762:GT:G	56274762	G	GT	0.48	Imputed	0.94583	0.3805	0.06983	3.789e-06
20	chr20:40828459:C:A	40828459	A	C	0.23	Imputed	0.67961	-0.419	0.06712	3.306e-07
20	chr20:40948107:G:T	40948107	T	G	0.18	Imputed	0.90854	-0.5113	0.08313	4.372e-07

## Sheet: Diabetes Onset
CHR	SNP	BP	A1	A2	MAF	Genotyped	Rsq	BETA	SE	P
1	chr1:110601385:G:A	110601385	A	G	0.14	Imputed	0.84823	-1.137	0.2223	6.968e-06
1	chr1:110609131:C:A	110609131	A	C	0.14	Imputed	0.88734	-1.137	0.2223	6.968e-06
1	chr1:110612200:C:G	110612200	G	C	0.14	Imputed	0.88911	-1.137	0.2223	6.968e-06
1	chr1:110612973:C:T	110612973	T	C	0.14	Imputed	0.90628	-1.137	0.2223	6.968e-06
1	chr1:110617454:T:C	110617454	C	T	0.13	Imputed	0.93177	-1.161	0.2311	9.363e-06
1	chr1:110618872:G:A	110618872	A	G	0.13	Imputed	0.92833	-1.161	0.2311	9.363e-06
1	chr1:110619055:G:A	110619055	A	G	0.13	Imputed	0.93291	-1.161	0.2311	9.363e-06
1	chr1:110623233:C:G	110623233	C	G	0.15	Imputed	0.76291	-1.12	0.2207	7.868e-06
2	chr2:47671695:G:C	47671695	C	G	0.08	Imputed	0.92612	-1.751	0.3412	6.543e-06
2	chr2:178079975:T:C	178079975	C	T	0.07	Imputed	0.95669	-1.738	0.3255	3.316e-06
2	chr2:178081441:C:T	178081441	T	C	0.07	Imputed	0.95654	-1.738	0.3255	3.316e-06
2	chr2:178087155:A:C	178087155	C	A	0.07	Imputed	0.95696	-1.738	0.3255	3.316e-06
2	chr2:178096871:C:T	178096871	T	C	0.07	Imputed	0.95476	-1.738	0.3255	3.316e-06
3	chr3:94461140:G:A	94461140	A	G	0.05	Imputed	0.91127	-1.904	0.358	3.549e-06
3	chr3:94466185:A:G	94466185	G	A	0.05	Imputed	0.90934	-1.904	0.358	3.549e-06
3	chr3:118067936:TAAAATC:T	118067936	T	TAAAATC	0.07	Imputed	0.7377	-1.7	0.2953	8.248e-07
3	chr3:118168643:C:T	118168643	T	C	0.11	Imputed	0.76005	-1.368	0.2117	7.818e-08
3	chr3:118172739:C:G	118172739	G	C	0.1	Imputed	0.7452	-1.413	0.2168	6.484e-08
5	chr5:2153906:C:T	2153906	T	C	0.1	Imputed	0.89422	-1.245	0.2467	8.72e-06
5	chr5:56114316:G:A	56114316	A	G	0.06	Imputed	0.92974	-1.641	0.2973	1.805e-06
6	chr6:49562202:T:C	49562202	C	T	0.05	Imputed	0.87317	-1.679	0.3176	3.957e-06
6	chr6:49576461:G:T	49576461	T	G	0.05	Imputed	0.8844	-1.679	0.3176	3.957e-06
6	chr6:49659424:T:G	49659424	G	T	0.05	Imputed	0.96279	-1.679	0.3176	3.957e-06
7	chr7:95883314:A:G	95883314	G	A	0.35	Imputed	0.95519	-0.9388	0.1798	4.896e-06
8	chr8:34831609:A:C	34831609	C	A	0.09	Imputed	0.66277	-1.39	0.2774	9.796e-06
10	chr10:14945441:A:G	14945441	A	G	0.09	Imputed	0.7568	-1.584	0.2792	1.085e-06
10	chr10:124179359:G:T	124179359	T	G	0.07	Imputed	0.66077	-1.415	0.2768	6.96e-06
10	chr10:125487022:G:C	125487022	C	G	0.05	Imputed	0.89674	-1.971	0.3524	1.425e-06
10	chr10:125489336:T:A	125489336	A	T	0.05	Imputed	0.8893	-1.971	0.3524	1.425e-06
10	chr10:125490984:A:G	125490984	G	A	0.05	Imputed	0.89987	-1.971	0.3524	1.425e-06
10	chr10:125492796:C:T	125492796	T	C	0.05	Imputed	0.89762	-1.971	0.3524	1.425e-06
11	chr11:11403359:C:T	11403359	C	T	0.22	Imputed	0.67995	-0.859	0.1623	3.861e-06
11	chr11:11403959:G:A	11403959	G	A	0.2	Imputed	0.67225	-0.9319	0.1825	7.162e-06
11	chr11:12057690:T:C	12057690	T	C	0.23	Imputed	0.71166	-0.9122	0.1659	1.949e-06
11	chr11:12060412:A:G	12060412	A	G	0.22	Imputed	0.72868	-0.8786	0.1705	6.124e-06
11	chr11:12061323:G:C	12061323	G	C	0.24	Imputed	0.78575	-0.8315	0.1471	1.172e-06
11	chr11:12062032:G:T	12062032	T	G	0.25	Genotyped	0.99642	-0.8665	0.1432	3.093e-07
11	chr11:12063363:T:C	12063363	T	C	0.28	Imputed	0.80868	-0.8134	0.157	5.576e-06
11	chr11:12073111:G:A	12073111	G	A	0.3	Imputed	0.8206	-0.762	0.1507	8.423e-06
11	chr11:12073239:A:T	12073239	A	T	0.3	Imputed	0.82064	-0.762	0.1507	8.423e-06
14	chr14:80295471:G:C	80295471	C	G	0.05	Imputed	0.65596	-1.896	0.3676	6.023e-06
15	chr15:76233085:G:A	76233085	A	G	0.31	Imputed	0.94553	-0.9498	0.1854	6.779e-06
16	chr16:5375322:G:C	5375322	C	G	0.06	Imputed	0.70872	-1.709	0.333	6.554e-06
16	chr16:5406628:G:A	5406628	A	G	0.06	Imputed	0.70357	-1.709	0.333	6.554e-06
16	chr16:82809054:A:G	82809054	G	A	0.29	Imputed	0.87461	-0.8138	0.1592	7.042e-06
16	chr16:82810174:C:T	82810174	T	C	0.29	Imputed	0.87552	-0.8138	0.1592	7.042e-06
16	chr16:82810876:AG:A	82810876	A	AG	0.29	Imputed	0.87481	-0.8138	0.1592	7.042e-06
16	chr16:82812921:G:A	82812921	A	G	0.28	Imputed	0.87545	-0.8566	0.1661	6.047e-06
16	chr16:82813275:A:C	82813275	C	A	0.28	Imputed	0.87313	-0.8566	0.1661	6.047e-06
16	chr16:82854026:A:G	82854026	A	G	0.35	Imputed	0.93704	-0.9127	0.1612	1.137e-06
16	chr16:82962024:CAT:C	82962024	C	CAT	0.19	Imputed	0.98451	-1.082	0.2059	4.399e-06
17	chr17:13103188:G:A	13103188	G	A	0.23	Imputed	0.78281	-0.9274	0.1711	2.538e-06
17	chr17:50009730:G:A	50009730	A	G	0.05	Imputed	0.82754	-1.915	0.3763	7.601e-06
19	chr19:40488826:A:AT	40488826	AT	A	0.06	Imputed	0.70101	-1.677	0.2743	2.499e-07
19	chr19:40489239:A:AG	40489239	AG	A	0.06	Imputed	0.70983	-1.677	0.2743	2.499e-07

## Sheet: Hypertension Onset
CHR	SNP	BP	A1	A2	MAF	Genotyped	Rsq	BETA	SE	P
1	chr1:100074733:A:G	100074733	G	A	0.08	Imputed	0.97551	-1.84	0.2762	7.611e-06
1	chr1:108346655:A:G	108346655	G	A	0.11	Imputed	0.9138	-2.043	0.2885	3.752e-06
1	chr1:108347999:G:A	108347999	A	G	0.11	Imputed	0.91457	-2.043	0.2885	3.752e-06
1	chr1:108354137:G:A	108354137	A	G	0.11	Imputed	0.91457	-2.043	0.2885	3.752e-06
1	chr1:108358946:G:A	108358946	A	G	0.11	Imputed	0.91519	-2.043	0.2885	3.752e-06
1	chr1:108361822:C:T	108361822	T	C	0.11	Imputed	0.91529	-2.043	0.2885	3.752e-06
1	chr1:208656198:A:G	208656198	G	A	0.08	Imputed	0.94687	-1.84	0.2762	7.611e-06
1	chr1:208659638:A:G	208659638	G	A	0.08	Imputed	0.94218	-1.84	0.2762	7.611e-06
1	chr1:212249225:C:A	212249225	A	C	0.4	Imputed	0.96726	-1.326	0.1983	7.281e-06
2	chr2:51602141:T:C	51602141	C	T	0.06	Imputed	0.96601	-2.043	0.2885	3.752e-06
2	chr2:51607713:T:A	51607713	A	T	0.06	Imputed	0.96786	-2.043	0.2885	3.752e-06
2	chr2:51618212:AT:A	51618212	A	AT	0.06	Imputed	0.96452	-2.043	0.2885	3.752e-06
2	chr2:51629467:A:G	51629467	G	A	0.09	Imputed	0.99144	-2.043	0.2885	3.752e-06
2	chr2:51672511:TTTTG:T	51672511	T	TTTTG	0.06	Imputed	0.96962	-2.043	0.2885	3.752e-06
2	chr2:51682320:A:G	51682320	G	A	0.06	Imputed	0.96894	-2.043	0.2885	3.752e-06
2	chr2:51716235:T:A	51716235	A	T	0.06	Imputed	0.95235	-2.043	0.2885	3.752e-06
2	chr2:51719830:G:T	51719830	T	G	0.06	Imputed	0.95403	-2.043	0.2885	3.752e-06
2	chr2:51721616:A:G	51721616	G	A	0.07	Imputed	0.97232	-2.043	0.2885	3.752e-06
2	chr2:51723333:G:A	51723333	A	G	0.07	Imputed	0.97102	-2.043	0.2885	3.752e-06
2	chr2:51723359:G:A	51723359	A	G	0.07	Imputed	0.97244	-2.043	0.2885	3.752e-06
2	chr2:51724429:G:C	51724429	C	G	0.07	Imputed	0.97166	-2.043	0.2885	3.752e-06
2	chr2:51740014:A:G	51740014	G	A	0.07	Imputed	0.96815	-2.043	0.2885	3.752e-06
2	chr2:51776515:T:C	51776515	C	T	0.06	Imputed	0.94377	-2.043	0.2885	3.752e-06
2	chr2:51850920:C:A	51850920	A	C	0.07	Imputed	0.96028	-2.043	0.2885	3.752e-06
2	chr2:51861518:C:T	51861518	T	C	0.07	Imputed	0.98132	-2.043	0.2885	3.752e-06
2	chr2:51863624:TATTA:T	51863624	T	TATTA	0.07	Imputed	0.98121	-2.043	0.2885	3.752e-06
2	chr2:51877336:A:G	51877336	G	A	0.07	Imputed	0.98247	-2.043	0.2885	3.752e-06
2	chr2:51892165:G:A	51892165	A	G	0.07	Imputed	0.97881	-2.043	0.2885	3.752e-06
2	chr2:51899358:C:A	51899358	A	C	0.07	Imputed	0.97526	-2.043	0.2885	3.752e-06
2	chr2:51928882:C:T	51928882	T	C	0.07	Imputed	0.98455	-2.043	0.2885	3.752e-06
2	chr2:51929664:C:T	51929664	T	C	0.07	Imputed	0.98643	-2.043	0.2885	3.752e-06
2	chr2:51938138:A:AT	51938138	AT	A	0.07	Imputed	0.98412	-2.043	0.2885	3.752e-06
2	chr2:51945859:TA:T	51945859	T	TA	0.07	Imputed	0.97923	-2.043	0.2885	3.752e-06
2	chr2:51945943:A:G	51945943	G	A	0.07	Imputed	0.982	-2.043	0.2885	3.752e-06
2	chr2:51947136:A:G	51947136	G	A	0.07	Imputed	0.98249	-2.043	0.2885	3.752e-06
2	chr2:51949729:C:A	51949729	A	C	0.07	Imputed	0.98073	-2.043	0.2885	3.752e-06
2	chr2:51949976:T:C	51949976	C	T	0.07	Imputed	0.9844	-2.043	0.2885	3.752e-06
2	chr2:51950538:T:C	51950538	C	T	0.07	Imputed	0.96717	-2.043	0.2885	3.752e-06
2	chr2:51951118:C:T	51951118	T	C	0.07	Imputed	0.98329	-2.043	0.2885	3.752e-06
2	chr2:51955092:C:T	51955092	T	C	0.08	Imputed	0.98266	-2.043	0.2885	3.752e-06
2	chr2:51956336:A:C	51956336	C	A	0.09	Imputed	0.98338	-2.043	0.2885	3.752e-06
2	chr2:51956719:T:C	51956719	C	T	0.07	Imputed	0.98278	-2.043	0.2885	3.752e-06
2	chr2:51956991:C:T	51956991	T	C	0.07	Imputed	0.98178	-2.043	0.2885	3.752e-06
2	chr2:51957053:T:C	51957053	C	T	0.09	Imputed	0.9827	-2.043	0.2885	3.752e-06
2	chr2:51958905:A:C	51958905	C	A	0.09	Imputed	0.98349	-2.043	0.2885	3.752e-06
2	chr2:51959960:T:G	51959960	G	T	0.07	Imputed	0.98393	-2.043	0.2885	3.752e-06
2	chr2:51964758:C:G	51964758	G	C	0.07	Imputed	0.98666	-2.043	0.2885	3.752e-06
2	chr2:51971881:G:A	51971881	A	G	0.07	Imputed	0.98849	-2.043	0.2885	3.752e-06
2	chr2:51979064:A:G	51979064	G	A	0.07	Imputed	0.9874	-2.043	0.2885	3.752e-06
2	chr2:51980332:C:A	51980332	A	C	0.07	Imputed	0.98651	-2.043	0.2885	3.752e-06
2	chr2:62530420:G:A	62530420	A	G	0.1	Imputed	0.92913	-2.043	0.2885	3.752e-06
3	chr3:4021069:A:C	4021069	C	A	0.07	Imputed	0.79664	-2.126	0.2965	3.219e-06
3	chr3:22728190:C:T	22728190	T	C	0.05	Imputed	0.95597	-1.84	0.2762	7.611e-06
3	chr3:41026674:C:G	41026674	C	G	0.07	Imputed	0.6809	-2.043	0.2885	3.752e-06
3	chr3:41039565:T:G	41039565	T	G	0.06	Imputed	0.68748	-2.043	0.2885	3.752e-06
3	chr3:41039566:T:C	41039566	T	C	0.06	Imputed	0.68748	-2.043	0.2885	3.752e-06
3	chr3:41041470:G:T	41041470	G	T	0.07	Imputed	0.71093	-2.043	0.2885	3.752e-06
3	chr3:41048950:C:G	41048950	C	G	0.06	Imputed	0.68714	-2.043	0.2885	3.752e-06
3	chr3:41049931:C:A	41049931	C	A	0.06	Imputed	0.68982	-2.043	0.2885	3.752e-06
3	chr3:41050717:G:GAATGT	41050717	G	GAATGT	0.06	Imputed	0.6868	-2.043	0.2885	3.752e-06
3	chr3:41054550:T:C	41054550	T	C	0.06	Imputed	0.68657	-2.043	0.2885	3.752e-06
3	chr3:41055755:T:C	41055755	T	C	0.06	Imputed	0.69019	-2.043	0.2885	3.752e-06
3	chr3:41058642:T:C	41058642	T	C	0.06	Imputed	0.68052	-2.043	0.2885	3.752e-06
3	chr3:41059715:C:CAT	41059715	C	CAT	0.06	Imputed	0.67189	-2.043	0.2885	3.752e-06
3	chr3:42684572:C:T	42684572	T	C	0.1	Imputed	0.95848	-1.84	0.2762	7.611e-06
3	chr3:172831162:CCTT:C	172831162	C	CCTT	0.1	Imputed	0.89839	-1.856	0.2543	2.615e-06
3	chr3:172843270:G:A	172843270	A	G	0.11	Imputed	0.90525	-1.856	0.2543	2.615e-06
4	chr4:14692947:G:A	14692947	A	G	0.36	Imputed	0.9759	-1.262	0.1886	7.229e-06
4	chr4:14693808:T:G	14693808	G	T	0.36	Genotyped	0.99916	-1.262	0.1886	7.229e-06
4	chr4:14705699:C:A	14705699	A	C	0.36	Imputed	0.97482	-1.262	0.1886	7.229e-06
4	chr4:14707677:T:C	14707677	C	T	0.36	Imputed	0.97579	-1.262	0.1886	7.229e-06
4	chr4:14708643:C:T	14708643	T	C	0.36	Imputed	0.97545	-1.262	0.1886	7.229e-06
4	chr4:14714440:A:G	14714440	G	A	0.37	Imputed	0.96592	-1.262	0.1886	7.229e-06
5	chr5:74386183:T:A	74386183	A	T	0.1	Imputed	0.9542	-1.846	0.2784	7.982e-06
5	chr5:74406096:G:T	74406096	T	G	0.1	Imputed	0.95502	-1.846	0.2784	7.982e-06
5	chr5:74433516:A:C	74433516	C	A	0.11	Imputed	0.95845	-1.846	0.2784	7.982e-06
5	chr5:75715264:C:T	75715264	T	C	0.06	Imputed	0.71137	-1.846	0.2784	7.982e-06
5	chr5:75766113:G:A	75766113	A	G	0.06	Imputed	0.73451	-1.846	0.2784	7.982e-06
5	chr5:75873709:T:C	75873709	C	T	0.08	Imputed	0.73995	-1.846	0.2784	7.982e-06
6	chr6:67019936:T:C	67019936	C	T	0.05	Imputed	0.96416	-2.043	0.2885	3.752e-06
6	chr6:67085011:GT:G	67085011	G	GT	0.05	Imputed	0.98168	-2.043	0.2885	3.752e-06
6	chr6:67096167:C:T	67096167	T	C	0.05	Imputed	0.98175	-2.043	0.2885	3.752e-06
6	chr6:67096371:C:T	67096371	T	C	0.05	Imputed	0.98064	-2.043	0.2885	3.752e-06
6	chr6:67130775:TTA:T	67130775	T	TTA	0.05	Imputed	0.98617	-2.043	0.2885	3.752e-06
6	chr6:67132075:AAAG:A	67132075	A	AAAG	0.05	Imputed	0.98643	-2.043	0.2885	3.752e-06
6	chr6:67133066:C:A	67133066	A	C	0.05	Imputed	0.98646	-2.043	0.2885	3.752e-06
6	chr6:67139768:A:G	67139768	G	A	0.05	Imputed	0.98792	-2.043	0.2885	3.752e-06
6	chr6:67150634:A:G	67150634	G	A	0.06	Imputed	0.98486	-2.043	0.2885	3.752e-06
6	chr6:67150686:G:T	67150686	T	G	0.06	Imputed	0.98488	-2.043	0.2885	3.752e-06
6	chr6:67150737:T:A	67150737	A	T	0.06	Imputed	0.98477	-2.043	0.2885	3.752e-06
6	chr6:67154539:C:T	67154539	T	C	0.06	Imputed	0.98432	-2.043	0.2885	3.752e-06
6	chr6:67154638:T:C	67154638	C	T	0.06	Imputed	0.98171	-2.043	0.2885	3.752e-06
6	chr6:67158289:T:C	67158289	C	T	0.06	Imputed	0.98451	-2.043	0.2885	3.752e-06
6	chr6:67159421:A:G	67159421	G	A	0.06	Imputed	0.98514	-2.043	0.2885	3.752e-06
6	chr6:67160557:G:T	67160557	T	G	0.06	Imputed	0.98649	-2.043	0.2885	3.752e-06
6	chr6:67162195:C:A	67162195	A	C	0.06	Imputed	0.98756	-2.043	0.2885	3.752e-06
6	chr6:67166326:C:T	67166326	T	C	0.06	Imputed	0.98742	-2.043	0.2885	3.752e-06
6	chr6:67166597:C:T	67166597	T	C	0.06	Imputed	0.98715	-2.043	0.2885	3.752e-06
6	chr6:67169609:A:C	67169609	C	A	0.06	Imputed	0.98748	-2.043	0.2885	3.752e-06
6	chr6:67172884:G:A	67172884	A	G	0.07	Imputed	0.98881	-2.043	0.2885	3.752e-06
6	chr6:67175409:A:G	67175409	G	A	0.07	Imputed	0.98926	-2.043	0.2885	3.752e-06
6	chr6:67175494:TG:T	67175494	T	TG	0.07	Imputed	0.98922	-2.043	0.2885	3.752e-06
6	chr6:67179906:C:T	67179906	T	C	0.07	Imputed	0.98862	-2.043	0.2885	3.752e-06
6	chr6:67180425:G:A	67180425	A	G	0.07	Imputed	0.98822	-2.043	0.2885	3.752e-06
6	chr6:67183229:A:C	67183229	C	A	0.07	Imputed	0.98872	-2.043	0.2885	3.752e-06
6	chr6:67183315:C:T	67183315	T	C	0.07	Imputed	0.9888	-2.043	0.2885	3.752e-06
6	chr6:67183433:G:A	67183433	A	G	0.07	Imputed	0.98877	-2.043	0.2885	3.752e-06
6	chr6:67186955:T:A	67186955	A	T	0.07	Imputed	0.98746	-2.043	0.2885	3.752e-06
6	chr6:67187469:G:C	67187469	C	G	0.07	Imputed	0.98718	-2.043	0.2885	3.752e-06
6	chr6:67188385:G:A	67188385	A	G	0.07	Imputed	0.98724	-2.043	0.2885	3.752e-06
6	chr6:67188824:A:T	67188824	T	A	0.07	Imputed	0.98709	-2.043	0.2885	3.752e-06
6	chr6:67189672:A:G	67189672	G	A	0.07	Imputed	0.98682	-2.043	0.2885	3.752e-06
6	chr6:67190806:T:A	67190806	A	T	0.07	Imputed	0.9872	-2.043	0.2885	3.752e-06
6	chr6:67191639:A:G	67191639	G	A	0.07	Imputed	0.98271	-2.043	0.2885	3.752e-06
6	chr6:67192388:C:T	67192388	T	C	0.07	Imputed	0.98294	-2.043	0.2885	3.752e-06
6	chr6:67193732:A:T	67193732	T	A	0.07	Imputed	0.98334	-2.043	0.2885	3.752e-06
6	chr6:67194657:G:A	67194657	A	G	0.07	Imputed	0.98281	-2.043	0.2885	3.752e-06
6	chr6:67195171:A:C	67195171	C	A	0.08	Imputed	0.97695	-2.043	0.2885	3.752e-06
6	chr6:67195531:C:T	67195531	T	C	0.06	Imputed	0.97093	-2.043	0.2885	3.752e-06
6	chr6:138889470:T:C	138889470	T	C	0.16	Imputed	0.86019	-1.94	0.2522	1.393e-06
6	chr6:138900713:G:T	138900713	G	T	0.16	Genotyped	0.99946	-1.94	0.2522	1.393e-06
6	chr6:138906248:G:A	138906248	G	A	0.16	Imputed	0.86963	-1.94	0.2522	1.393e-06
6	chr6:138908558:A:G	138908558	A	G	0.16	Imputed	0.88806	-1.94	0.2522	1.393e-06
6	chr6:138908606:C:T	138908606	C	T	0.16	Imputed	0.87451	-1.94	0.2522	1.393e-06
6	chr6:138913491:G:C	138913491	G	C	0.16	Imputed	0.89039	-1.94	0.2522	1.393e-06
6	chr6:138935627:A:G	138935627	A	G	0.17	Imputed	0.86688	-1.94	0.2522	1.393e-06
6	chr6:138940340:G:A	138940340	G	A	0.16	Imputed	0.88478	-1.94	0.2522	1.393e-06
6	chr6:138944142:C:T	138944142	C	T	0.16	Imputed	0.87147	-1.94	0.2522	1.393e-06
6	chr6:138946871:C:T	138946871	C	T	0.16	Imputed	0.86781	-1.94	0.2522	1.393e-06
6	chr6:138950938:C:T	138950938	T	C	0.15	Imputed	0.92479	-1.94	0.2522	1.393e-06
6	chr6:138952311:A:C	138952311	C	A	0.16	Imputed	0.9612	-1.94	0.2522	1.393e-06
6	chr6:138953738:T:C	138953738	C	T	0.16	Imputed	0.96127	-1.94	0.2522	1.393e-06
6	chr6:138957039:CA:C	138957039	C	CA	0.16	Imputed	0.95682	-1.94	0.2522	1.393e-06
6	chr6:138964189:T:C	138964189	C	T	0.16	Imputed	0.95428	-1.94	0.2522	1.393e-06
6	chr6:138967827:C:A	138967827	A	C	0.16	Imputed	0.9602	-1.94	0.2522	1.393e-06
6	chr6:138968315:T:C	138968315	C	T	0.16	Imputed	0.95947	-1.94	0.2522	1.393e-06
6	chr6:138971972:C:A	138971972	A	C	0.16	Imputed	0.95505	-1.94	0.2522	1.393e-06
6	chr6:138973055:C:G	138973055	G	C	0.16	Imputed	0.95509	-1.94	0.2522	1.393e-06
6	chr6:138980040:C:T	138980040	T	C	0.16	Imputed	0.94408	-1.94	0.2522	1.393e-06
6	chr6:138982004:T:C	138982004	C	T	0.16	Imputed	0.94341	-1.94	0.2522	1.393e-06
6	chr6:138990746:C:T	138990746	T	C	0.16	Imputed	0.91603	-1.94	0.2522	1.393e-06
6	chr6:138991402:A:G	138991402	G	A	0.16	Imputed	0.92219	-1.94	0.2522	1.393e-06
7	chr7:130982233:C:CA	130982233	CA	C	0.15	Imputed	0.87759	-2.043	0.2885	3.752e-06
10	chr10:15029619:C:T	15029619	T	C	0.19	Imputed	0.97098	-1.92	0.2853	6.739e-06
10	chr10:15039879:T:C	15039879	C	T	0.19	Imputed	0.96295	-1.92	0.2853	6.739e-06
10	chr10:20525755:G:A	20525755	A	G	0.09	Imputed	0.97835	-1.92	0.2853	6.739e-06
10	chr10:20525892:G:A	20525892	A	G	0.09	Imputed	0.97841	-1.92	0.2853	6.739e-06
10	chr10:20526538:C:T	20526538	T	C	0.09	Imputed	0.97195	-1.92	0.2853	6.739e-06
10	chr10:20528637:G:C	20528637	C	G	0.1	Imputed	0.97203	-1.92	0.2853	6.739e-06
10	chr10:20529180:A:G	20529180	G	A	0.1	Imputed	0.97209	-1.92	0.2853	6.739e-06
10	chr10:20531351:C:T	20531351	T	C	0.1	Imputed	0.98013	-1.92	0.2853	6.739e-06
10	chr10:20531797:G:A	20531797	A	G	0.1	Imputed	0.98075	-1.92	0.2853	6.739e-06
10	chr10:20532830:C:G	20532830	G	C	0.1	Imputed	0.98151	-1.92	0.2853	6.739e-06
10	chr10:20533002:T:C	20533002	C	T	0.1	Imputed	0.98143	-1.92	0.2853	6.739e-06
10	chr10:20533457:C:T	20533457	T	C	0.1	Imputed	0.9809	-1.92	0.2853	6.739e-06
10	chr10:20533677:T:C	20533677	C	T	0.1	Imputed	0.98151	-1.92	0.2853	6.739e-06
10	chr10:20533923:A:G	20533923	G	A	0.1	Imputed	0.98134	-1.92	0.2853	6.739e-06
10	chr10:20535785:T:C	20535785	C	T	0.1	Imputed	0.98189	-1.92	0.2853	6.739e-06
10	chr10:20535960:G:A	20535960	A	G	0.1	Imputed	0.9811	-1.92	0.2853	6.739e-06
10	chr10:20537509:C:A	20537509	A	C	0.1	Imputed	0.9823	-1.92	0.2853	6.739e-06
10	chr10:20538140:G:A	20538140	A	G	0.1	Imputed	0.98198	-1.92	0.2853	6.739e-06
10	chr10:20539812:T:C	20539812	C	T	0.1	Imputed	0.9805	-1.92	0.2853	6.739e-06
10	chr10:20540979:A:G	20540979	G	A	0.1	Imputed	0.98216	-1.92	0.2853	6.739e-06
10	chr10:20541376:G:A	20541376	A	G	0.1	Imputed	0.98199	-1.92	0.2853	6.739e-06
10	chr10:20541630:T:C	20541630	C	T	0.1	Imputed	0.98216	-1.92	0.2853	6.739e-06
10	chr10:20545939:G:A	20545939	A	G	0.1	Imputed	0.9825	-1.92	0.2853	6.739e-06
10	chr10:20546534:C:G	20546534	G	C	0.1	Imputed	0.98348	-1.92	0.2853	6.739e-06
10	chr10:20546923:A:AT	20546923	AT	A	0.1	Imputed	0.97934	-1.92	0.2853	6.739e-06
10	chr10:20548444:C:T	20548444	T	C	0.1	Imputed	0.98294	-1.92	0.2853	6.739e-06
10	chr10:20549497:C:T	20549497	T	C	0.1	Imputed	0.98287	-1.92	0.2853	6.739e-06
10	chr10:20549717:G:A	20549717	A	G	0.09	Imputed	0.98186	-1.92	0.2853	6.739e-06
10	chr10:20549817:T:C	20549817	C	T	0.1	Imputed	0.98274	-1.92	0.2853	6.739e-06
10	chr10:20550533:G:T	20550533	T	G	0.1	Imputed	0.98276	-1.92	0.2853	6.739e-06
10	chr10:20550918:A:T	20550918	T	A	0.1	Imputed	0.98285	-1.92	0.2853	6.739e-06
10	chr10:20550961:C:T	20550961	T	C	0.1	Imputed	0.9824	-1.92	0.2853	6.739e-06
10	chr10:20551945:T:C	20551945	C	T	0.1	Imputed	0.98262	-1.92	0.2853	6.739e-06
10	chr10:20553392:G:C	20553392	C	G	0.1	Imputed	0.98085	-1.92	0.2853	6.739e-06
10	chr10:20553685:G:C	20553685	C	G	0.1	Imputed	0.98091	-1.92	0.2853	6.739e-06
10	chr10:20556016:C:T	20556016	T	C	0.1	Imputed	0.97958	-1.92	0.2853	6.739e-06
10	chr10:20557948:C:G	20557948	G	C	0.11	Imputed	0.98009	-1.613	0.2454	8.86e-06
10	chr10:20559490:T:C	20559490	C	T	0.11	Imputed	0.97584	-1.613	0.2454	8.86e-06
10	chr10:20559491:G:T	20559491	T	G	0.11	Imputed	0.97529	-1.613	0.2454	8.86e-06
10	chr10:20559497:G:A	20559497	A	G	0.11	Imputed	0.97606	-1.613	0.2454	8.86e-06
10	chr10:43880187:C:T	43880187	T	C	0.15	Imputed	0.98554	-1.446	0.2171	7.637e-06
10	chr10:43880232:C:G	43880232	G	C	0.15	Imputed	0.98575	-1.446	0.2171	7.637e-06
10	chr10:43880330:TG:T	43880330	T	TG	0.15	Imputed	0.98486	-1.446	0.2171	7.637e-06
10	chr10:43880477:G:T	43880477	T	G	0.13	Imputed	0.96365	-1.539	0.2294	6.987e-06
10	chr10:43881479:T:C	43881479	C	T	0.15	Imputed	0.98609	-1.446	0.2171	7.637e-06
13	chr13:26819188:C:T	26819188	C	T	0.12	Imputed	0.81826	-1.846	0.2784	7.982e-06
13	chr13:26820239:G:A	26820239	A	G	0.05	Imputed	0.82102	-2.043	0.2885	3.752e-06
14	chr14:33356984:C:T	33356984	T	C	0.31	Imputed	0.90634	-1.258	0.1871	6.852e-06
14	chr14:82874025:T:C	82874025	T	C	0.25	Imputed	0.74038	-1.496	0.2099	3.463e-06
14	chr14:82874027:A:G	82874027	A	G	0.26	Imputed	0.73887	-1.496	0.2099	3.463e-06
15	chr15:66147425:G:A	66147425	A	G	0.06	Imputed	0.84198	-2.126	0.2965	3.219e-06
15	chr15:66150172:T:A	66150172	A	T	0.06	Imputed	0.82872	-2.126	0.2965	3.219e-06
15	chr15:66150446:G:A	66150446	A	G	0.06	Imputed	0.82874	-2.126	0.2965	3.219e-06
16	chr16:52386662:T:TA	52386662	TA	T	0.16	Imputed	0.96117	-2.126	0.2965	3.219e-06
16	chr16:52387228:T:A	52387228	A	T	0.16	Imputed	0.96742	-2.126	0.2965	3.219e-06
16	chr16:52388502:T:C	52388502	C	T	0.16	Imputed	0.96773	-2.126	0.2965	3.219e-06
16	chr16:59074272:G:A	59074272	A	G	0.14	Imputed	0.95517	-1.75	0.1779	6.18e-08
16	chr16:74446671:T:C	74446671	C	T	0.14	Imputed	0.96839	-1.84	0.2762	7.611e-06
16	chr16:74450268:T:C	74450268	C	T	0.11	Imputed	0.97199	-2.043	0.2885	3.752e-06
16	chr16:74465691:G:A	74465691	A	G	0.13	Imputed	0.97922	-1.84	0.2762	7.611e-06
16	chr16:74469133:G:T	74469133	T	G	0.13	Imputed	0.97884	-1.84	0.2762	7.611e-06
16	chr16:74471087:A:T	74471087	T	A	0.13	Imputed	0.97878	-1.84	0.2762	7.611e-06
16	chr16:74489418:C:A	74489418	A	C	0.11	Imputed	0.97175	-2.043	0.2885	3.752e-06
16	chr16:74502402:A:G	74502402	G	A	0.14	Genotyped	0.9994	-1.84	0.2762	7.611e-06
16	chr16:74512291:T:A	74512291	A	T	0.11	Imputed	0.96395	-2.043	0.2885	3.752e-06
16	chr16:74522160:G:C	74522160	C	G	0.14	Imputed	0.98413	-1.84	0.2762	7.611e-06
16	chr16:74528274:T:C	74528274	C	T	0.14	Imputed	0.98754	-1.84	0.2762	7.611e-06
16	chr16:74533177:C:G	74533177	G	C	0.14	Imputed	0.98722	-1.84	0.2762	7.611e-06
16	chr16:74656213:G:A	74656213	A	G	0.11	Imputed	0.96557	-2.043	0.2885	3.752e-06
16	chr16:74685120:T:C	74685120	C	T	0.1	Imputed	0.94573	-2.043	0.2885	3.752e-06
16	chr16:83132305:T:C	83132305	C	T	0.19	Imputed	0.68464	-1.437	0.1966	2.583e-06
17	chr17:73705343:T:C	73705343	C	T	0.06	Imputed	0.86968	-2.043	0.2885	3.752e-06
17	chr17:73709754:T:G	73709754	G	T	0.06	Imputed	0.92047	-2.043	0.2885	3.752e-06
18	chr18:49846704:A:G	49846704	A	G	0.16	Genotyped	0.99974	-1.383	0.2103	8.797e-06
18	chr18:49846814:T:C	49846814	T	C	0.16	Imputed	0.91251	-1.383	0.2103	8.797e-06
18	chr18:49846816:C:T	49846816	C	T	0.16	Imputed	0.91312	-1.383	0.2103	8.797e-06
18	chr18:55112846:T:A	55112846	A	T	0.08	Imputed	0.98964	-1.846	0.2784	7.982e-06
18	chr18:55113678:A:G	55113678	G	A	0.08	Genotyped	0.99935	-1.846	0.2784	7.982e-06
18	chr18:55115255:A:G	55115255	G	A	0.08	Imputed	0.98939	-1.846	0.2784	7.982e-06
18	chr18:55115323:G:A	55115323	A	G	0.08	Imputed	0.98943	-1.846	0.2784	7.982e-06
18	chr18:55119440:T:C	55119440	C	T	0.08	Imputed	0.98815	-1.846	0.2784	7.982e-06
18	chr18:55120351:C:T	55120351	T	C	0.08	Imputed	0.98755	-1.846	0.2784	7.982e-06
18	chr18:55126816:C:A	55126816	A	C	0.08	Imputed	0.98757	-1.846	0.2784	7.982e-06
18	chr18:55127606:T:A	55127606	A	T	0.07	Imputed	0.97882	-1.846	0.2784	7.982e-06
18	chr18:55163070:C:T	55163070	T	C	0.05	Imputed	0.93037	-2.043	0.2885	3.752e-06
18	chr18:55199560:A:G	55199560	G	A	0.05	Imputed	0.97459	-2.043	0.2885	3.752e-06
18	chr18:55750408:A:G	55750408	A	G	0.05	Imputed	0.80815	-2.043	0.2885	3.752e-06
18	chr18:55751320:T:C	55751320	T	C	0.05	Imputed	0.80837	-2.043	0.2885	3.752e-06
18	chr18:55753171:T:TG	55753171	T	TG	0.05	Imputed	0.80572	-2.043	0.2885	3.752e-06
18	chr18:55755676:G:A	55755676	G	A	0.05	Imputed	0.81813	-2.043	0.2885	3.752e-06
18	chr18:55755913:A:G	55755913	A	G	0.05	Imputed	0.81938	-2.043	0.2885	3.752e-06
18	chr18:66903284:A:G	66903284	A	G	0.06	Imputed	0.77768	-2.043	0.2885	3.752e-06
18	chr18:66909072:T:A	66909072	T	A	0.06	Imputed	0.78078	-2.043	0.2885	3.752e-06
18	chr18:66909114:G:GT	66909114	G	GT	0.06	Imputed	0.77627	-2.043	0.2885	3.752e-06
18	chr18:67277795:AG:A	67277795	A	AG	0.1	Imputed	0.9776	-2.043	0.2885	3.752e-06
18	chr18:67295752:T:C	67295752	T	C	0.11	Imputed	0.81695	-2.043	0.2885	3.752e-06
18	chr18:67303313:G:T	67303313	G	T	0.1	Imputed	0.89941	-2.043	0.2885	3.752e-06
19	chr19:40362122:A:C	40362122	A	C	0.07	Imputed	0.68663	-2.043	0.2885	3.752e-06
19	chr19:40363619:G:C	40363619	G	C	0.07	Imputed	0.69276	-2.043	0.2885	3.752e-06
19	chr19:40365894:T:A	40365894	T	A	0.07	Imputed	0.6932	-2.043	0.2885	3.752e-06
19	chr19:40366127:T:G	40366127	T	G	0.07	Imputed	0.69395	-2.043	0.2885	3.752e-06

## Sheet: eGDR
CHR	SNP	BP	A1	A2	MAF	Genotyped	Rsq	BETA	SE	P
1	chr1:170140964:C:T	170140964	C	T	0.24	Imputed	0.94425	-1.349	0.2398	4.466e-06
2	chr2:207477717:T:C	207477717	C	T	0.2	Imputed	0.8272	-1.395	0.2591	8.722e-06
3	chr3:159216564:T:C	159216564	C	T	0.19	Imputed	0.92868	-1.51	0.2771	7.322e-06
3	chr3:159217553:T:C	159217553	C	T	0.19	Imputed	0.92866	-1.51	0.2771	7.322e-06
3	chr3:159224465:A:G	159224465	G	A	0.19	Imputed	0.92756	-1.51	0.2771	7.322e-06
3	chr3:159225043:A:G	159225043	G	A	0.19	Imputed	0.92738	-1.51	0.2771	7.322e-06
3	chr3:159231434:A:G	159231434	G	A	0.19	Imputed	0.92713	-1.51	0.2771	7.322e-06
3	chr3:159241918:A:C	159241918	C	A	0.19	Imputed	0.9243	-1.51	0.2771	7.322e-06
3	chr3:159242049:T:C	159242049	C	T	0.19	Imputed	0.92356	-1.51	0.2771	7.322e-06
3	chr3:159252399:T:C	159252399	C	T	0.18	Imputed	0.91597	-1.51	0.2771	7.322e-06
3	chr3:159253255:T:C	159253255	C	T	0.18	Imputed	0.91594	-1.51	0.2771	7.322e-06
3	chr3:159255556:A:G	159255556	G	A	0.18	Imputed	0.91601	-1.51	0.2771	7.322e-06
3	chr3:159256614:C:T	159256614	T	C	0.18	Imputed	0.9159	-1.51	0.2771	7.322e-06
3	chr3:159260507:G:C	159260507	C	G	0.18	Imputed	0.91513	-1.51	0.2771	7.322e-06
3	chr3:159264552:A:G	159264552	G	A	0.18	Imputed	0.91506	-1.51	0.2771	7.322e-06
3	chr3:159272922:GA:G	159272922	G	GA	0.18	Imputed	0.91408	-1.51	0.2771	7.322e-06
3	chr3:159276593:T:G	159276593	G	T	0.18	Imputed	0.91436	-1.51	0.2771	7.322e-06
3	chr3:159276877:A:G	159276877	G	A	0.18	Imputed	0.91439	-1.51	0.2771	7.322e-06
3	chr3:159281116:CT:C	159281116	C	CT	0.18	Imputed	0.91422	-1.51	0.2771	7.322e-06
3	chr3:159282129:A:G	159282129	G	A	0.18	Imputed	0.91436	-1.51	0.2771	7.322e-06
3	chr3:159282397:C:T	159282397	T	C	0.18	Imputed	0.91417	-1.51	0.2771	7.322e-06
3	chr3:159284103:T:C	159284103	C	T	0.18	Imputed	0.91428	-1.51	0.2771	7.322e-06
3	chr3:159286117:AT:A	159286117	A	AT	0.18	Imputed	0.91421	-1.51	0.2771	7.322e-06
3	chr3:159289246:A:G	159289246	G	A	0.18	Imputed	0.91437	-1.51	0.2771	7.322e-06
3	chr3:159291028:A:G	159291028	G	A	0.18	Imputed	0.91356	-1.51	0.2771	7.322e-06
3	chr3:159291547:T:G	159291547	G	T	0.18	Imputed	0.91346	-1.51	0.2771	7.322e-06
3	chr3:159292124:A:T	159292124	T	A	0.18	Imputed	0.91351	-1.51	0.2771	7.322e-06
3	chr3:159292270:T:C	159292270	C	T	0.18	Imputed	0.91349	-1.51	0.2771	7.322e-06
3	chr3:159299221:T:C	159299221	C	T	0.19	Imputed	0.91502	-1.529	0.2665	3.28e-06
3	chr3:159304109:G:T	159304109	T	G	0.19	Imputed	0.92159	-1.529	0.2665	3.28e-06
3	chr3:159304912:C:A	159304912	A	C	0.19	Imputed	0.92179	-1.529	0.2665	3.28e-06
7	chr7:11687900:C:T	11687900	T	C	0.33	Imputed	0.97849	-1.023	0.1905	9.036e-06
7	chr7:11697399:G:A	11697399	A	G	0.29	Imputed	0.98715	-1.023	0.1905	9.036e-06
7	chr7:11700393:C:T	11700393	T	C	0.29	Genotyped	0.99945	-1.023	0.1905	9.036e-06
7	chr7:11700856:A:T	11700856	T	A	0.29	Imputed	0.98737	-1.023	0.1905	9.036e-06
7	chr7:11701572:C:T	11701572	T	C	0.29	Imputed	0.98651	-1.023	0.1905	9.036e-06
8	chr8:106919701:T:C	106919701	C	T	0.14	Imputed	0.91617	1.419	0.2656	9.735e-06
10	chr10:16424290:C:T	16424290	T	C	0.3	Imputed	0.92773	-1.263	0.216	2.425e-06
11	chr11:72898074:T:C	72898074	T	C	0.47	Genotyped	0.99977	1.241	0.1891	3.455e-07
11	chr11:72924063:C:G	72924063	C	G	0.48	Imputed	0.95482	1.13	0.1929	2.354e-06
11	chr11:72973853:T:C	72973853	T	C	0.48	Imputed	0.9556	1.13	0.1929	2.354e-06
11	chr11:73049120:T:C	73049120	T	C	0.48	Imputed	0.95112	1.13	0.1929	2.354e-06
11	chr11:73055152:A:G	73055152	A	G	0.48	Imputed	0.94555	1.13	0.1929	2.354e-06
11	chr11:73073628:A:G	73073628	A	G	0.48	Imputed	0.94671	1.13	0.1929	2.354e-06
11	chr11:73080844:T:C	73080844	T	C	0.48	Imputed	0.94682	1.13	0.1929	2.354e-06
11	chr11:73121632:A:G	73121632	A	G	0.48	Imputed	0.94373	1.13	0.1929	2.354e-06
11	chr11:73133347:A:T	73133347	A	T	0.48	Imputed	0.94441	1.13	0.1929	2.354e-06
14	chr14:20268179:T:C	20268179	C	T	0.31	Imputed	0.90745	-1.116	0.1859	1.584e-06
15	chr15:37283516:A:G	37283516	G	A	0.44	Imputed	0.87205	0.8859	0.1659	9.866e-06
15	chr15:54051398:A:C	54051398	C	A	0.35	Imputed	0.9509	0.9543	0.1741	6.646e-06
16	chr16:65372805:T:C	65372805	T	C	0.47	Imputed	0.88141	-1.122	0.2102	9.841e-06
22	chr22:28803157:T:C	28803157	C	T	0.18	Imputed	0.98813	-1.539	0.272	4.078e-06
22	chr22:28803725:A:G	28803725	G	A	0.17	Imputed	0.96623	-1.539	0.272	4.078e-06
22	chr22:28830889:G:T	28830889	T	G	0.18	Imputed	0.99083	-1.539	0.272	4.078e-06
22	chr22:28888370:T:A	28888370	A	T	0.18	Imputed	0.99201	-1.539	0.272	4.078e-06
22	chr22:28890760:C:G	28890760	G	C	0.18	Imputed	0.99217	-1.539	0.272	4.078e-06
22	chr22:28895342:C:G	28895342	G	C	0.18	Imputed	0.99216	-1.539	0.272	4.078e-06
22	chr22:28896227:C:T	28896227	T	C	0.18	Imputed	0.9708	-1.539	0.272	4.078e-06
22	chr22:29019737:A:G	29019737	G	A	0.17	Imputed	0.96573	-1.539	0.272	4.078e-06

## Sheet: Glucose
CHR	SNP	BP	A1	A2	MAF	Genotyped	Rsq	BETA	SE	P
1	chr1:244327544:T:G	244327544	G	T	0.38	Imputed	0.68694	-0.9249	0.1727	7.07e-06
1	chr1:244327711:G:T	244327711	T	G	0.38	Imputed	0.68739	-0.9249	0.1727	7.07e-06
1	chr1:244327725:T:C	244327725	C	T	0.38	Imputed	0.68734	-0.9249	0.1727	7.07e-06
1	chr1:244328282:A:G	244328282	G	A	0.38	Imputed	0.68713	-0.9249	0.1727	7.07e-06
1	chr1:244328539:T:C	244328539	C	T	0.38	Imputed	0.68737	-0.9249	0.1727	7.07e-06
1	chr1:244328588:G:C	244328588	C	G	0.38	Imputed	0.68742	-0.9249	0.1727	7.07e-06
1	chr1:244328613:G:A	244328613	A	G	0.38	Imputed	0.68743	-0.9249	0.1727	7.07e-06
1	chr1:244328855:A:G	244328855	G	A	0.38	Imputed	0.68738	-0.9249	0.1727	7.07e-06
1	chr1:244329086:A:C	244329086	C	A	0.38	Imputed	0.68473	-0.9249	0.1727	7.07e-06
1	chr1:244329609:G:A	244329609	A	G	0.38	Imputed	0.68726	-0.9249	0.1727	7.07e-06
20	chr20:12471130:T:C	12471130	C	T	0.21	Imputed	0.84203	-1.32	0.248	7.833e-06
20	chr20:12483534:C:T	12483534	T	C	0.18	Imputed	0.84172	-1.36	0.2432	3.551e-06
20	chr20:12485046:C:T	12485046	T	C	0.18	Imputed	0.84184	-1.36	0.2432	3.551e-06
20	chr20:12498486:T:C	12498486	C	T	0.16	Imputed	0.82377	-1.42	0.2451	1.966e-06

## Sheet: HbA1c
CHR	SNP	BP	A1	A2	MAF	Genotyped	Rsq	BETA	SE	P
1	chr1:10747773:A:C	10747773	C	A	0.12	Imputed	0.82126	-1.786	0.323	5.814e-06
4	chr4:139891634:C:T	139891634	C	T	0.35	Imputed	0.83524	-1.245	0.2224	4.841e-06
6	chr6:137479757:C:G	137479757	G	C	0.18	Imputed	0.96847	-1.368	0.243	4.435e-06
6	chr6:137491024:C:T	137491024	T	C	0.19	Imputed	0.92339	-1.392	0.2302	1.401e-06
6	chr6:160774834:C:A	160774834	A	C	0.18	Imputed	0.9206	1.567	0.2683	2.47e-06
6	chr6:160775026:T:C	160775026	C	T	0.2	Imputed	0.92338	1.567	0.2683	2.47e-06
6	chr6:160775130:A:G	160775130	G	A	0.18	Imputed	0.92052	1.567	0.2683	2.47e-06
6	chr6:160775265:T:C	160775265	C	T	0.19	Imputed	0.92238	1.567	0.2683	2.47e-06
6	chr6:160775768:A:G	160775768	G	A	0.19	Imputed	0.92115	1.567	0.2683	2.47e-06
6	chr6:160779123:G:T	160779123	T	G	0.2	Imputed	0.92423	1.567	0.2683	2.47e-06
6	chr6:160779301:TA:T	160779301	T	TA	0.19	Imputed	0.92116	1.567	0.2683	2.47e-06
7	chr7:136029303:A:C	136029303	C	A	0.12	Imputed	0.90001	-1.665	0.3112	9.571e-06
9	chr9:2585686:A:G	2585686	G	A	0.16	Imputed	0.96903	-1.717	0.2758	8.63e-07
9	chr9:124334022:C:A	124334022	A	C	0.24	Imputed	0.9629	-1.457	0.2392	1.24e-06
15	chr15:37566864:T:C	37566864	C	T	0.35	Imputed	0.92127	-1.063	0.1987	9.612e-06
15	chr15:37569351:T:A	37569351	A	T	0.35	Imputed	0.92179	-1.063	0.1987	9.612e-06
15	chr15:37571111:G:A	37571111	A	G	0.35	Imputed	0.922	-1.063	0.1987	9.612e-06
15	chr15:37571616:T:G	37571616	G	T	0.35	Imputed	0.92175	-1.063	0.1987	9.612e-06
15	chr15:37593688:T:A	37593688	A	T	0.44	Imputed	0.93763	-0.9371	0.1644	3.632e-06
15	chr15:37593782:A:G	37593782	G	A	0.42	Imputed	0.93636	-0.9215	0.1629	4.117e-06
15	chr15:37595145:TA:T	37595145	T	TA	0.41	Imputed	0.93091	-0.9625	0.1557	9.741e-07
15	chr15:37606942:C:T	37606942	T	C	0.38	Imputed	0.95025	-0.9855	0.1718	3.308e-06
15	chr15:37606943:T:C	37606943	C	T	0.38	Imputed	0.95031	-0.9855	0.1718	3.308e-06
15	chr15:37608672:C:T	37608672	T	C	0.38	Imputed	0.95041	-0.9855	0.1718	3.308e-06
15	chr15:37621550:A:G	37621550	G	A	0.35	Imputed	0.94672	-1.063	0.1987	9.612e-06
15	chr15:37623548:G:T	37623548	T	G	0.38	Imputed	0.95248	-0.9855	0.1718	3.308e-06
15	chr15:37624246:C:T	37624246	T	C	0.37	Imputed	0.92474	-0.9559	0.1773	8.525e-06
15	chr15:37624272:A:C	37624272	C	A	0.38	Imputed	0.95339	-0.9855	0.1718	3.308e-06
15	chr15:37627464:T:A	37627464	A	T	0.38	Imputed	0.9531	-0.9855	0.1718	3.308e-06
15	chr15:37628462:A:C	37628462	C	A	0.38	Imputed	0.94829	-0.9855	0.1718	3.308e-06
15	chr15:37629092:T:C	37629092	C	T	0.38	Imputed	0.95297	-0.9855	0.1718	3.308e-06
15	chr15:37630066:C:A	37630066	A	C	0.38	Genotyped	0.99691	-0.9855	0.1718	3.308e-06
15	chr15:37630130:C:T	37630130	T	C	0.38	Imputed	0.95493	-0.9855	0.1718	3.308e-06
15	chr15:37630409:C:T	37630409	T	C	0.38	Imputed	0.95441	-0.9855	0.1718	3.308e-06
15	chr15:37633268:T:C	37633268	C	T	0.37	Imputed	0.92211	-0.9559	0.1773	8.525e-06
15	chr15:37636345:G:A	37636345	A	G	0.37	Imputed	0.92148	-0.9559	0.1773	8.525e-06
15	chr15:37637724:C:T	37637724	T	C	0.38	Imputed	0.94887	-0.9855	0.1718	3.308e-06
15	chr15:37638343:C:T	37638343	T	C	0.38	Imputed	0.95218	-0.9855	0.1718	3.308e-06
15	chr15:37641434:C:A	37641434	A	C	0.38	Imputed	0.93952	-0.9855	0.1718	3.308e-06
16	chr16:6979106:T:C	6979106	C	T	0.29	Imputed	0.88558	-1.175	0.2125	5.811e-06
19	chr19:4575692:G:C	4575692	C	G	0.18	Imputed	0.95177	-1.482	0.2711	6.952e-06
19	chr19:4578983:A:C	4578983	C	A	0.15	Imputed	0.95162	-1.587	0.294	8.381e-06
19	chr19:4583493:C:A	4583493	A	C	0.15	Imputed	0.95413	-1.587	0.294	8.381e-06

[truncated: 9 more sheets: HDL Cholesterol, IA-2A, BMI, Insulin dose, LDL Cholesterol, Weight, Mean Blood Pressure, Height, Triglycerides]
