# Supplementary figures and images for: Phenome-Wide Association Study of Latent Autoimmune Diabetes from a Southern Mexican Population Implicates rs7305229 with Plasmatic AntiGlutamic Acid Decarboxylase Autoantibody (GADA) Levels
Source: Preprints.org preprint supplement (doi:10.20944/preprints202409.0287.v1), 2024-09-04

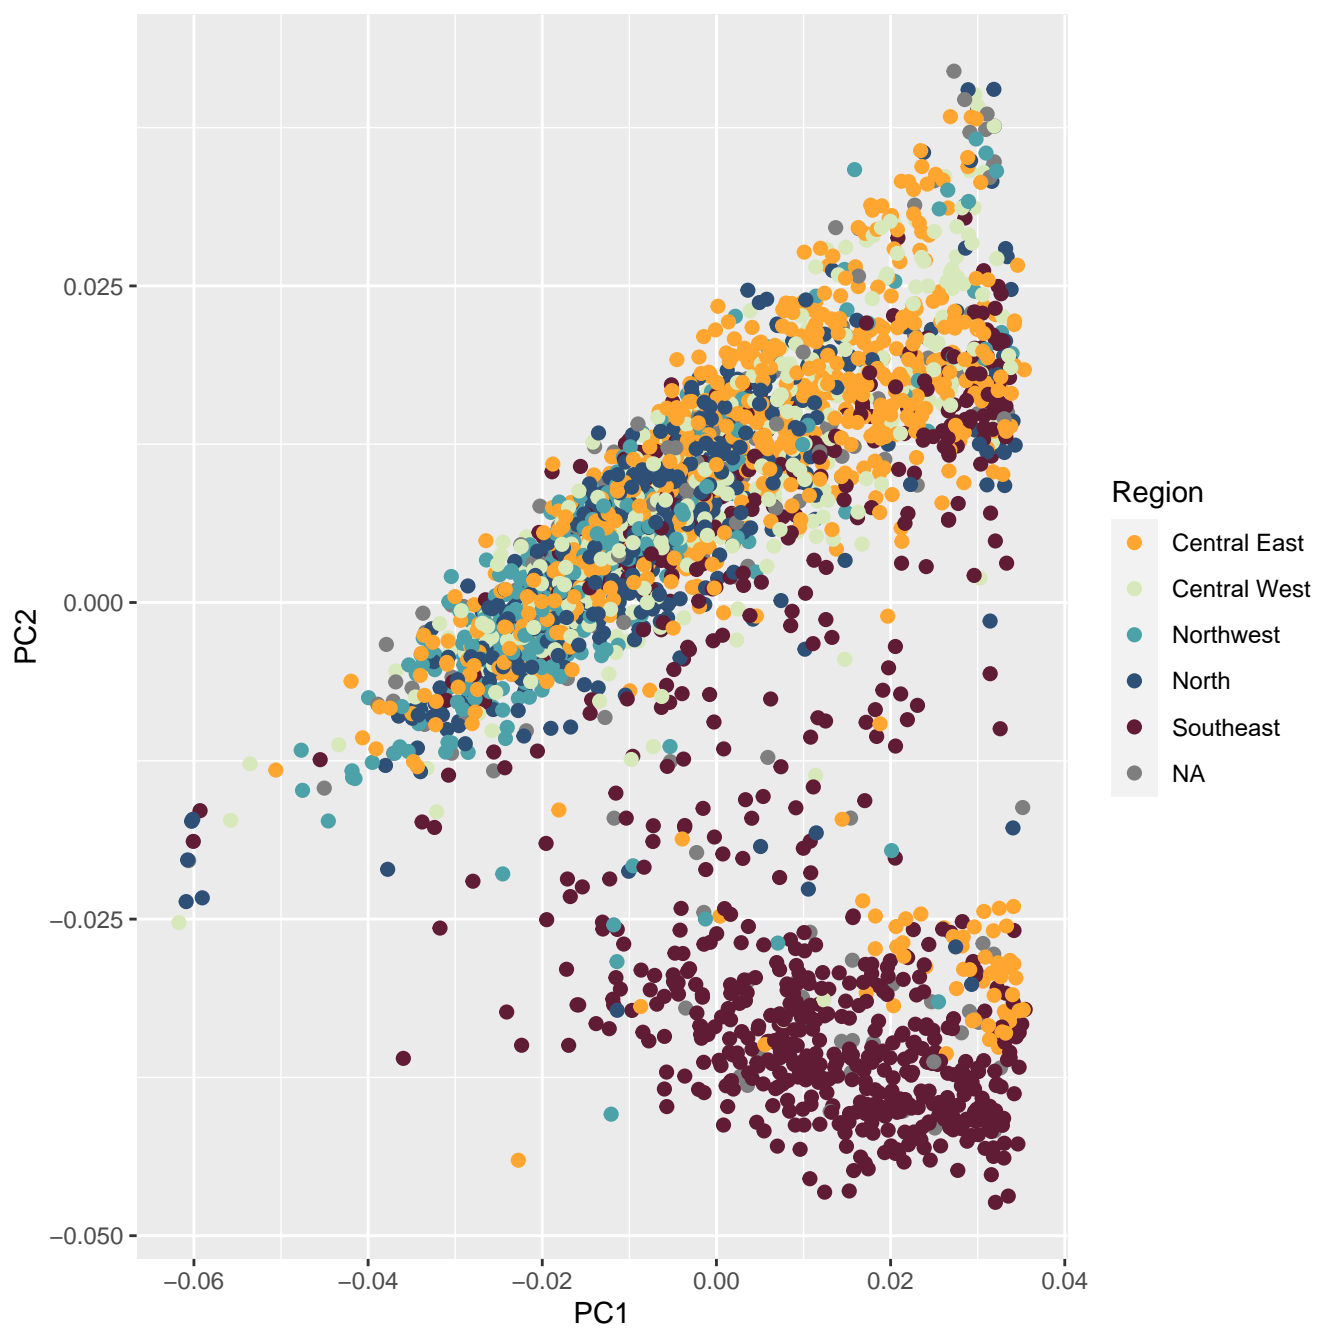

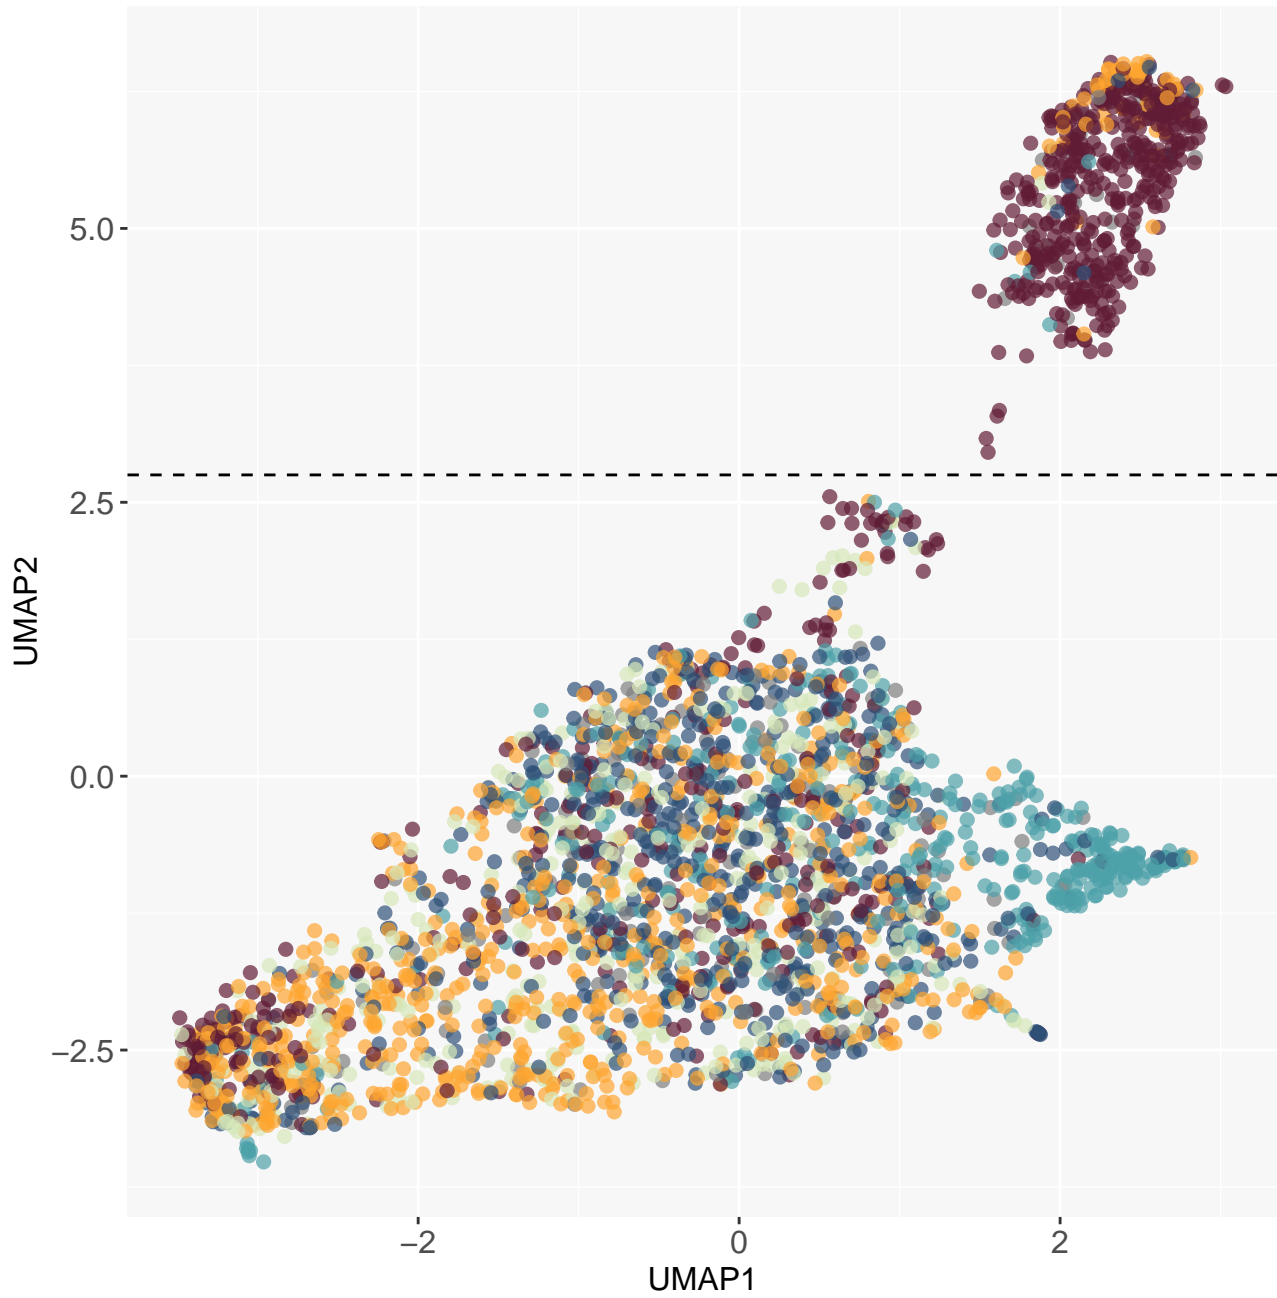

Supplement: Supplementary file 2 [file supplementary]
